# Supplementary material for: Survival outcomes and independent response assessment with nivolumab plus ipilimumab versus sunitinib in patients with advanced renal cell carcinoma: 42-month follow-up of a randomized phase 3 clinical trial
Source: PubMed Central journal article supplement — J Immunother Cancer. 2021 May 3;8(2):e000891. doi: 10.1136/jitc-2020-000891 (PMC7359377; doi:10.1136/jitc-2020-000891), 2021-05-03
Supplement: jitc-2020-000891supp001.pdf [file jitc-2020-000891supp001.pdf]

### Additional Files

#### **Survival outcomes and independent response assessment with nivolumab plus ipilimumab versus sunitinib in patients with advanced renal cell carcinoma: 42-month follow-up of a randomized phase 3 clinical trial**

**Table S1** Demographic and baseline disease characteristics

**Table S2** Confirmed objective response per investigator in intermediate-risk/poor-risk patients, the intent-to-treat population, and in favorable-risk patients

**Table S3** Treatment-related adverse event summary

**Table S4** Select treatment-related adverse event summary

**Figure S1** CONSORT diagram

**Figure S2** Time to confirmed deterioration in FKSI-19 domains

This supplementary material has been provided by the authors to give readers additional information about their work.

**Table S1** Demographic and baseline disease characteristics<sup>1</sup>

| Variable <sup>a</sup>                                              | IMDC<br>Intermediate risk/<br>poor risk |                | ITT<br>population   |                | IMDC<br>favorable risk |                |
|--------------------------------------------------------------------|-----------------------------------------|----------------|---------------------|----------------|------------------------|----------------|
|                                                                    | NIVO+IPI<br>(N=425)                     | SUN<br>(N=422) | NIVO+IPI<br>(N=550) | SUN<br>(N=546) | NIVO+IPI<br>(N=125)    | SUN<br>(N=124) |
| Median age (range), years                                          | 62 (26–85)                              | 61 (21–85)     | 62 (26–85)          | 62 (21–85)     | 62 (36–85)             | 63 (38–83)     |
| Sex, n (%)                                                         |                                         |                |                     |                |                        |                |
| Male                                                               | 314 (74)                                | 301 (71)       | 413 (75)            | 395 (72)       | 99 (79)                | 94 (76)        |
| Female                                                             | 111 (26)                                | 121 (29)       | 137 (25)            | 151 (28)       | 26 (21)                | 30 (24)        |
| IMDC prognostic score, n (%)                                       |                                         |                |                     |                |                        |                |
| Favorable (0)                                                      | 0                                       | 0              | 125 (23)            | 124 (23)       | 125 (100)              | 124 (100)      |
| Intermediate (1–2)                                                 | 334 (79)                                | 333 (79)       | 334 (61)            | 333 (61)       | 0                      | 0              |
| Poor (3–6)                                                         | 91 (21)                                 | 89 (21)        | 91 (17)             | 89 (16)        | 0                      | 0              |
| Region, n (%)                                                      |                                         |                |                     |                |                        |                |
| United States                                                      | 112 (26)                                | 111 (26)       | 154 (28)            | 153 (28)       | 42 (34)                | 42 (34)        |
| Canada/Europe                                                      | 148 (35)                                | 146 (35)       | 201 (37)            | 199 (36)       | 53 (42)                | 53 (43)        |
| Rest of the world                                                  | 165 (39)                                | 165 (39)       | 195 (35)            | 194 (36)       | 30 (24)                | 29 (23)        |
| Prior radiotherapy, n (%)                                          | 52 (12)                                 | 52 (12)        | 63 (11)             | 70 (13)        | 11 (9)                 | 18 (15)        |
| Prior nephrectomy, n (%)                                           | 341 (80)                                | 319 (76)       | 453 (82)            | 437 (80)       | 112 (90)               | 118 (95)       |
| No. of sites with target/<br>nontarget lesions, n (%) <sup>b</sup> |                                         |                |                     |                |                        |                |
| 1                                                                  | 90 (21)                                 | 84 (20)        | 123 (22)            | 118 (22)       | 33 (26)                | 34 (27)        |
| ≥2                                                                 | 335 (79)                                | 337 (80)       | 427 (78)            | 427 (78)       | 92 (74)                | 90 (73)        |
| Sites of metastasis, n (%) <sup>c</sup>                            |                                         |                |                     |                |                        |                |
| Lung                                                               | 294 (69)                                | 296 (70)       | 381 (69)            | 373 (68)       | 87 (70)                | 77 (62)        |
| Lymph node                                                         | 190 (45)                                | 216 (51)       | 246 (45)            | 268 (49)       | 56 (45)                | 52 (42)        |
| Bone <sup>d</sup>                                                  | 95 (22)                                 | 97 (23)        | 112 (20)            | 119 (22)       | 17 (14)                | 22 (18)        |
| Liver                                                              | 88 (21)                                 | 89 (21)        | 99 (18)             | 107 (20)       | 11 (9)                 | 18 (15)        |

|                                            |          |          |          |          |          |         |
|--------------------------------------------|----------|----------|----------|----------|----------|---------|
| Quantifiable tumor PD-L1 expression, n (%) | N=384    | N=392    | N=499    | N=503    | N=115    | N=111   |
| <1%                                        | 284 (74) | 278 (71) | 386 (77) | 376 (75) | 102 (89) | 98 (88) |
| ≥1%                                        | 100 (26) | 114 (29) | 113 (23) | 127 (25) | 13 (11)  | 13 (12) |

<sup>a</sup>Information shown in the table is based on data collected with the use of an interactive voice-response system.

<sup>b</sup>The number of target or nontarget lesions at baseline was not reported for 1 patient in the SUN arm.

<sup>c</sup>Among favorable-risk patients, 21 (17%) patients in each arm had baseline pancreas lesions.

<sup>d</sup>Bone with and without soft-tissue component.

IMDC, International Metastatic Renal Cell Carcinoma Database Consortium; ITT, intent-to-treat; NIVO+IPI, nivolumab plus ipilimumab; PD-L1, programmed death ligand 1; SUN, sunitinib.

#### REFERENCES

1. Motzer RJ, Tannir NM, McDermott DF, *et al.* *N Engl J Med* 2018;378:1277–90.

**Table S2** Confirmed objective response per investigator in intermediate-risk/poor-risk patients, the intent-to-treat population, and in favorable-risk patients

| Variable                            | NIVO+IPI IMDC<br>Intermediate risk/<br>poor risk<br>(N=425) | NIVO+IPI ITT<br>population<br>(N=550) | NIVO+IPI IMDC<br>favorable risk<br>(N=125) |
|-------------------------------------|-------------------------------------------------------------|---------------------------------------|--------------------------------------------|
| Objective response rate, % (95% CI) | 42.4<br>(37.6–47.2)                                         | 41.6<br>(37.5–45.9)                   | 39.2<br>(30.6–48.3)                        |
| Best overall response, %            |                                                             |                                       |                                            |
| Complete response                   | 12.2                                                        | 11.3                                  | 8.0                                        |
| Partial response                    | 30.1                                                        | 30.4                                  | 31.2                                       |
| Stable disease                      | 25.6                                                        | 29.8                                  | 44.0                                       |
| Progressive disease                 | 24.9                                                        | 22.0                                  | 12.0                                       |
| Unable to determine/not reported    | 7.1                                                         | 6.5                                   | 4.8                                        |
| Variable                            | SUN IMDC<br>Intermediate risk/<br>poor risk<br>(N=422)      | SUN ITT<br>population<br>(N=546)      | SUN IMDC<br>favorable risk<br>(N=124)      |
| Objective response rate, % (95% CI) | 29.4<br>(25.1–34.0)                                         | 34.1<br>(30.1–38.2)                   | 50.0<br>(40.9–59.1)                        |
| Best overall response, %            |                                                             |                                       |                                            |
| Complete response                   | 1.4                                                         | 2.2                                   | 4.8                                        |
| Partial response                    | 28.0                                                        | 31.9                                  | 45.2                                       |
| Stable disease                      | 41.0                                                        | 40.5                                  | 38.7                                       |
| Progressive disease                 | 19.2                                                        | 15.9                                  | 4.8                                        |
| Unable to determine/not reported    | 10.4                                                        | 9.5                                   | 6.5                                        |

ITT, intent-to-treat; NIVO+IPI, nivolumab plus ipilimumab; SUN, sunitinib.

**Table S3** Treatment-related adverse event summary

| Variable <sup>a</sup>                                        | N (%)             |            |              |            |
|--------------------------------------------------------------|-------------------|------------|--------------|------------|
|                                                              | NIVO+IPI<br>N=547 |            | SUN<br>N=535 |            |
|                                                              | Any grade         | Grade 3–4  | Any grade    | Grade 3–4  |
| Overall treatment-related AEs <sup>b</sup>                   | 514 (94.0)        | 259 (47.3) | 521 (97.4)   | 343 (64.1) |
| Fatigue                                                      | 208 (38.0)        | 24 (4.4)   | 266 (49.7)   | 52 (9.7)   |
| Pruritis                                                     | 160 (29.3)        | 3 (0.5)    | 49 (9.2)     | 0          |
| Diarrhea                                                     | 155 (28.3)        | 21 (3.8)   | 284 (53.1)   | 31 (5.8)   |
| Rash                                                         | 124 (22.7)        | 9 (1.6)    | 70 (13.1)    | 0          |
| Nausea                                                       | 110 (20.1)        | 8 (1.5)    | 207 (38.7)   | 7 (1.3)    |
| Increased lipase                                             | 93 (17.0)         | 58 (10.6)  | 61 (11.4)    | 36 (6.7)   |
| Hypothyroidism                                               | 89 (16.3)         | 2 (0.4)    | 141 (26.4)   | 1 (0.2)    |
| Decreased appetite                                           | 76 (13.9)         | 7 (1.3)    | 135 (25.2)   | 6 (1.1)    |
| Asthenia                                                     | 74 (13.5)         | 10 (1.8)   | 93 (17.4)    | 13 (2.4)   |
| Vomiting                                                     | 61 (11.2)         | 4 (0.7)    | 115 (21.5)   | 10 (1.9)   |
| Anemia                                                       | 36 (6.6)          | 3 (0.5)    | 84 (15.7)    | 23 (4.3)   |
| Dysgeusia                                                    | 26 (4.8)          | 0          | 118 (22.1)   | 1 (0.2)    |
| Stomatitis                                                   | 25 (4.6)          | 0          | 151 (28.2)   | 14 (2.6)   |
| Dyspepsia                                                    | 16 (2.9)          | 0          | 97 (18.1)    | 0          |
| Mucosal inflammation                                         | 15 (2.7)          | 1 (0.2)    | 154 (28.8)   | 15 (2.8)   |
| Hypertension                                                 | 12 (2.2)          | 4 (0.7)    | 220 (41.1)   | 91 (17.0)  |
| Palmoplantar erythrodysesthesia                              | 6 (1.1)           | 1 (0.2)    | 233 (43.6)   | 50 (9.3)   |
| Thrombocytopenia                                             | 3 (0.5)           | 0          | 96 (17.9)    | 23 (4.3)   |
| Treatment-related AE leading to discontinuation <sup>c</sup> | 121 (22.1)        | 84 (15.4)  | 69 (12.9)    | 39 (7.3)   |

<sup>a</sup>Includes events reported between first dose and 30 days after last dose of study therapy.

<sup>b</sup>Listed are AEs that were reported in ≥15% of the patients in either arm.

<sup>c</sup>AEs of any grade that led to discontinuation in ≥5 patients in the NIVO+IPI arm were increased alanine aminotransferase (n=15), pneumonitis or diarrhea (both n=14), increased aspartate aminotransferase (n=12), colitis or hypophysitis (both n=7), and adrenal insufficiency (n=5); fatigue (n=7), and diarrhea or increased alanine aminotransferase (both n=5) led to discontinuation in ≥5 patients in the SUN arm.

AE, adverse event; NIVO+IPI, nivolumab plus ipilimumab; SUN, sunitinib.

**Table S4** Select treatment-related adverse event summary

| Organ class <sup>a</sup> | N (%)             |           |              |           |
|--------------------------|-------------------|-----------|--------------|-----------|
|                          | NIVO+IPI<br>N=547 |           | SUN<br>N=535 |           |
|                          | Any grade         | Grade 3–4 | Any grade    | Grade 3–4 |
| Gastrointestinal         | 163 (29.8)        | 27 (4.9)  | 284 (53.1)   | 31 (5.8)  |
| Hepatic                  | 105 (19.2)        | 47 (8.6)  | 79 (14.8)    | 21 (3.9)  |
| Skin                     | 273 (49.9)        | 21 (3.8)  | 305 (57.0)   | 55 (10.3) |
| Endocrine                | 179 (32.7)        | 38 (6.9)  | 168 (31.4)   | 1 (0.2)   |
| Pulmonary                | 37 (6.8)          | 6 (1.1)   | 2 (0.4)      | 0         |
| Renal                    | 56 (10.2)         | 7 (1.3)   | 47 (8.8)     | 6 (1.1)   |

<sup>a</sup>Includes potentially immune-mediated adverse events reported between first dose and 30 days after last dose of study therapy.

AE, adverse event; NIVO+IPI, nivolumab plus ipilimumab; SUN, sunitinib.

**Figure S1.** CONSORT diagram.

Twenty-four intermediate-risk/poor-risk patients crossed over from sunitinib to nivolumab plus ipilimumab after the primary endpoint was assessed but were not analyzed as part of the nivolumab plus ipilimumab efficacy or safety population.

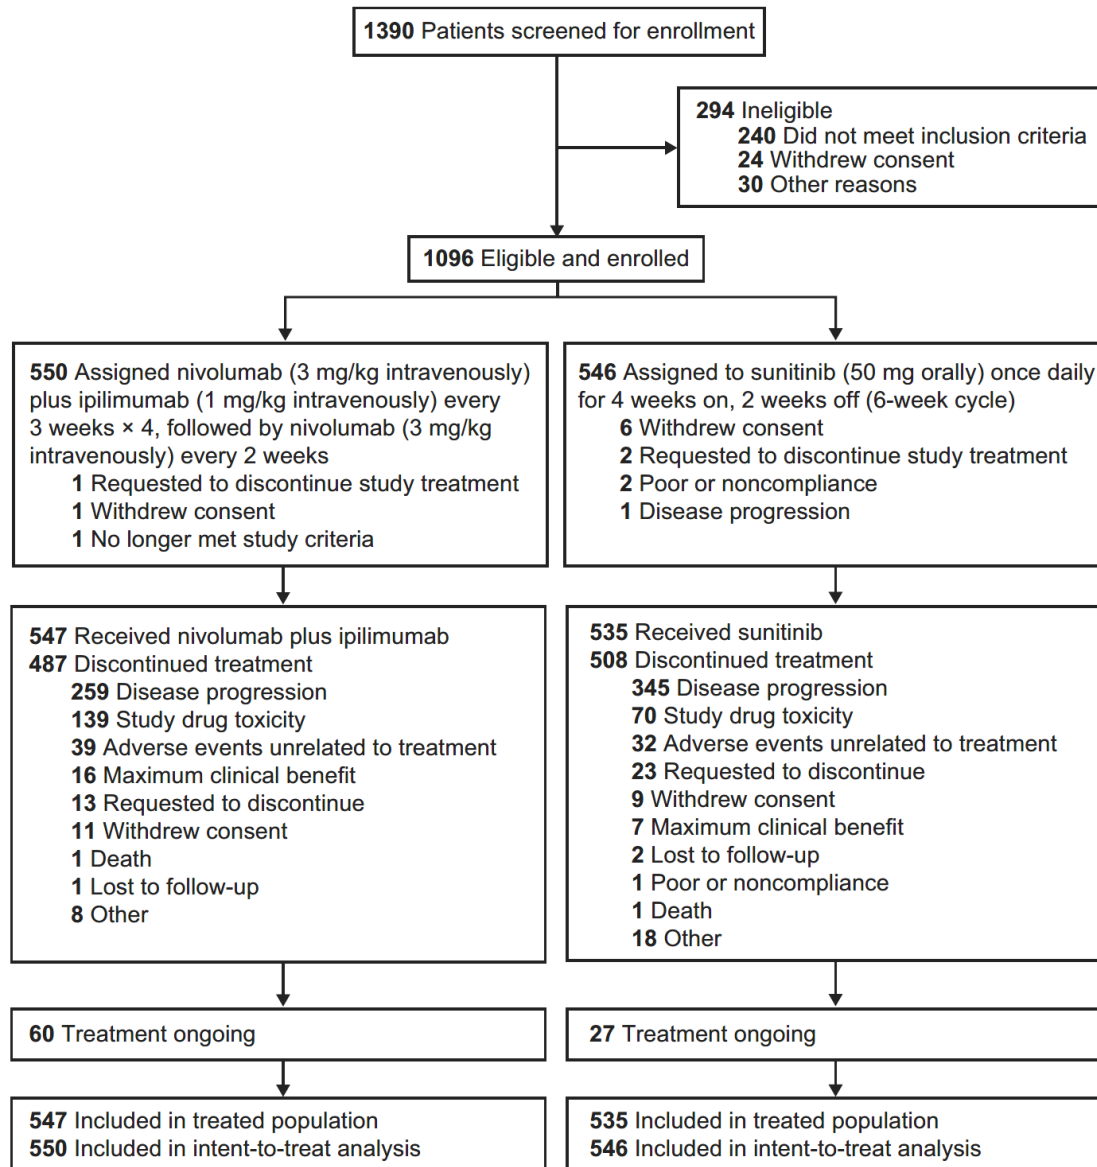

**Figure S2** Time to confirmed deterioration in FKSI-19 domains.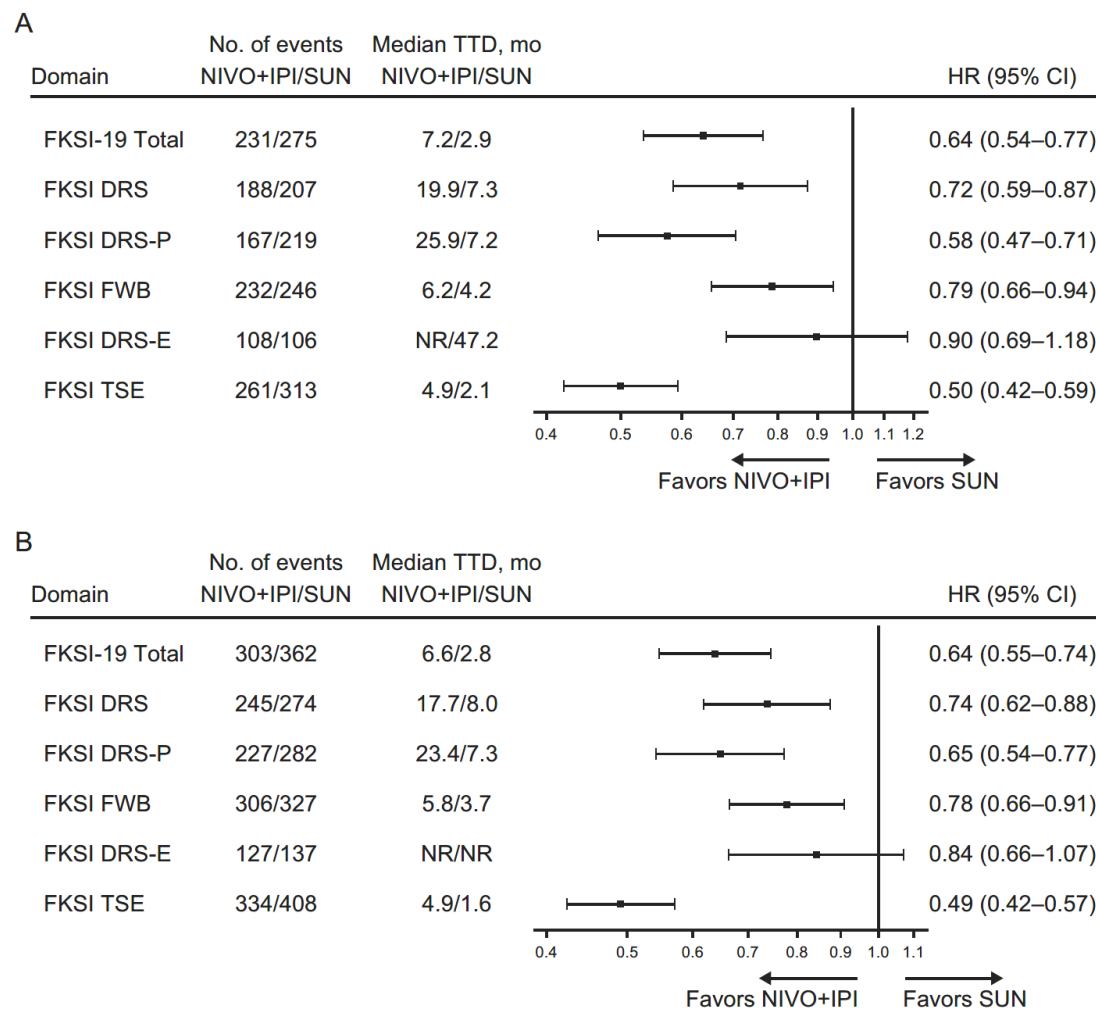

A, In intermediate-risk/poor-risk patients. B, In ITT patients.

Data points are hazard ratios and error bars are 95% CIs. Deterioration was defined as a decrease in score of either  $\geq 3$  points (FKSI-19 and DRS), 1 point (DRS-E, TSE, FWB), or 4 points (DRS-P) compared with baseline and confirmed at the next consecutive visit.

DRS, disease-related symptoms; DRS-E, disease-related symptoms-emotional; DRS-P, disease-related symptoms-physical; FKSI-19, Functional Assessment of Cancer Therapy–Kidney Symptom Index-19; FWB, functional well-being; NIVO+IPI, nivolumab plus ipilimumab; SUN, sunitinib; TSE, treatment side effects.
